# Supplementary material
Source: PubMed Central journal article supplement (PMC10954083)
Supplement: NIHMS1959177-supplement-SuppFig1.pdf [file NIHMS1959177-supplement-SuppFig1.pdf]

Supplemental Figure 1. Scatterplot of the ACE Score and the Positive Parenting Practices Count



Note: Size of each point reflects the weighted proportion for each combination of ACE and Parenting counts. The dark blue line represents the fit of a generalized additive model to these weighted points. The standard error shading around the fitted curve is crude and does not reflect the uncertainty of the estimated point proportions. For purposes of this exploratory analysis, we did not collapse the small count categories for either outcome.
