# Supplementary material
Source: PubMed Central journal article supplement (PMC10954083)
Supplement: NIHMS1959177-supplement-SuppFig2.pdf [file NIHMS1959177-supplement-SuppFig2.pdf]

Supplemental Figure 2. Interaction between ACEs and parenting practices

Low Social-Emotional Wellbeing

General Developmental Risk

Predicted Risk Probability

ACE Score

- 0
- 1
- 2-3
- 4+

0-2

3

4

5

6

Positive Parenting Practices

0-2

3

4

5

6

0.6

0.4

0.2

Our study also examined the possibility of an ACEs by Parenting interaction for each outcome. To avoid sparsity of cell frequencies, the Parenting variable was treated as a continuous predictor with ordered categories of 0-2, 3, 4, 5, and 6. The inclusion of an interaction term was not statistically significant in either model ( $p > 0.98$  and  $p > 0.94$ ). Predicted effects from the moderation models are depicted above holding covariates at their modal (male, white not Hispanic, household educated beyond high school) or mean (2.53 years old) values.
